# Supplementary material for: Suppression of tumor angiogenesis by metformin treatment via a mechanism linked to targeting of HER2/HIF-1α/VEGF secretion axis
Source: Oncotarget. 2015 Nov 2;6(42):44579–92. doi: 10.18632/oncotarget.6373 (PMC4792577; doi:10.18632/oncotarget.6373)
Supplement: Supplementary file 1 [file oncotarget-06-44579-s001.pdf]

## SUPPLEMENTARY INFORMATION OF MATERIALS AND METHODS

### RNA Interference

To perform the RNA interference experiment, we purchased the siRNA for HIF-1 $\alpha$  from GenePharm (Shanghai, China). 3x10<sup>5</sup> MDA-MB-453 cells were seeded in a six-well plate and transfected with 100 nM siRNA by using lipofectamine RNAi MAX reagent (Invitrogen, USA) according to the manufacturer's instructions. The related sequences were listed as following:

SiRNA for HIF-1 $\alpha$ : 5'-CCACCACUGAUGAAUU  
AAATT-3', 5'-UUUAAUUCAGUGGUGGTT-3'

Negative Control siRNA: 5'-UUCUCCGAACGUG  
UCACGUTT-3', 5'-ACGUGACACGUUCGGAGAA  
TT-3')

## SUPPLEMENTARY FIGURES

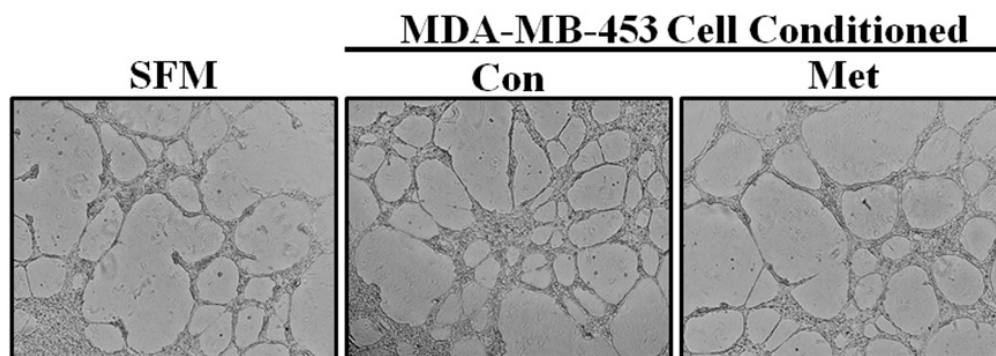

**Supplementary Figure S1: Representative images of HMEC-1-mediated tube formation.** HMEC-1 was cultured in the presence of SFM or 75% TCM of MDA-MB-453 cells either, with or without the pretreatment of metformin. 200X.

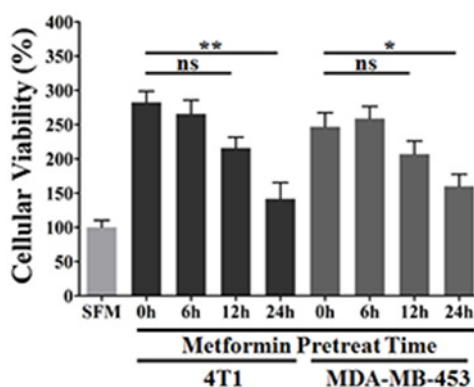

**Supplementary Figure S2: Representative images of HUVEC proliferation promoted by TCM of MDA-MB-453 cells that were pretreated with metformin over multiple time periods ( $n = 6$ ).**

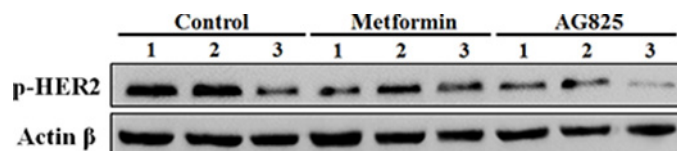

**Supplementary Figure S3:** Immunoblotting for p-HER2 (Tyr 1221/1222) and actin-β in 4T1 tumors from mice treated with metformin (200 mg/kg day), AG825 (10 mg/kg day), or feeding with water (control). Equal amounts of total proteins (80 μg/lane) were loaded.

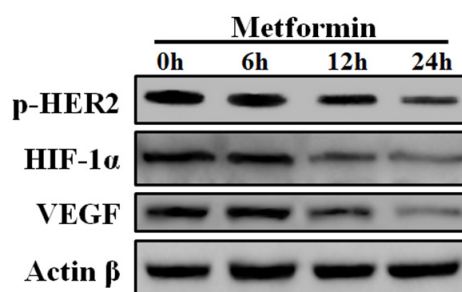

**Supplementary Figure S4:** Immunoblotting for detection of protein levels of phospho-HER2, HIF-1α, and VEGF in MDA-MB-453 cells treated with metformin over multiple time periods.

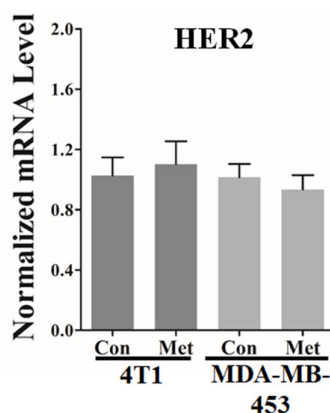

**Supplementary Figure S5:** Representative images of the mRNA levels of HER2 in 4T1 and MDA-MB-453 cancer cells treated with metformin or not ( $n = 5$ ,  $n = 5$ , respectively).

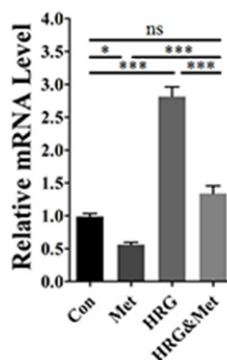

**Supplementary Figure S6:** Representative images showing the mRNA level of VEGF in MDA-MB-453 cells ( $n = 5$ ).

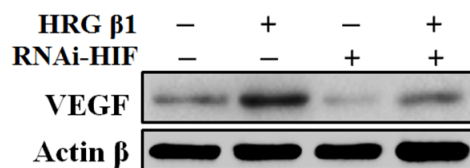

Supplementary Figure S7: Immunoblotting for detecting protein levels of VEGF<sub>165</sub> in MDA-MB-453 cells.

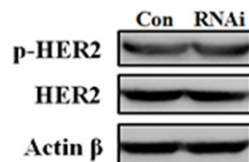

Supplementary Figure S8: Immunoblotting for total level and phosphorylation level of HER2 protein in MDA-MB-453 cells.

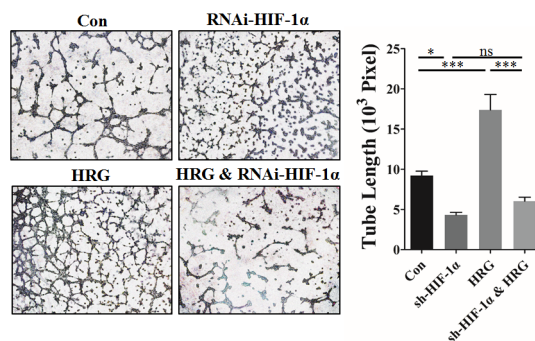

Supplementary Figure S9: Representative images showing HUVEC-mediated tube formation. HMEC-1 was cultured in the presence of SFM or 75% TCM from MDA-MB-453 cells transduced or not transduced with RNAi targeting HIF-1 $\alpha$  in the absence or presence of Heregulin (HRG)- $\beta$ 1 pretreatment. 200X (Left). Quantification of the tube length produced by HUVECs (Right).

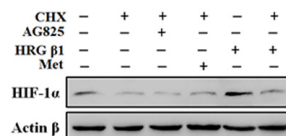

Supplementary Figure S10: Immunoblotting for the detection of the protein level of HIF-1 $\alpha$  in MDA-MB-453 cells.

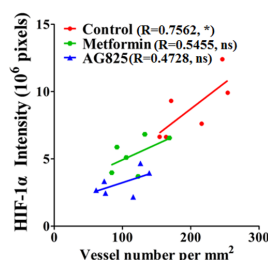

Supplementary Figure S11: Representative images showing the linear correlation between HIF-1 $\alpha$  fluorescent intensity and microvessel density in 4T1 tumor. Sperman analysis was used to determine the significance of the linear correlation. \* $P$  < 0.05.
